# Supplementary material for: Influence of dicarboxylic acid polymer in enhancing the growth and productivity of sweet potato (Ipomoea batatas L.) in acidic soil
Source: PeerJ. 2023 Feb 2;11:e14803. doi: 10.7717/peerj.14803 (PMC9899431; doi:10.7717/peerj.14803)
Supplement: Supplemental Information 1 [file peerj-11-14803-s001.xlsx]

## Sheet: Initial soil properties
	a. Soil chemical properties
	Site	Depth (cm)	pHH2O	EC	CEC	Exchangeable cations				AP	TP	SOM	TN (%)
			(1:2.5)	(mS cm−1)	(cmolc kg−1)	(cmolc kg−1)				(mg P kg−1)	(% P)	(%)
						Na+	K+	Ca2+	Mg2+
	Dong Thap	0–15	4.12	0.82	19.2	0.31	0.21	3.18	2.37	19.2	0.08	4.21	0.13
		15–30	4.23	1.12	18.9	0.42	0.16	4.22	2.95	16.8	0.05	3.56	0.09
	Vinh Long	0–15	3.96	0.75	20.1	0.56	0.19	3.56	2.38	15.9	0.06	4.59	0.11
		15–30	4.1	0.66	19.6	0.38	0.32	3.29	3.26	16.7	0.09	4.1	0.1
	b. Soil physical and toxicity parameters
	Site	Depth	BD (g cm−3)	Total porosity (%)	AWC (mm m−3)	Soil particles (%)			Fe2+ (mg kg−1)	Fe2O3 (%)	Sulfate S (μg S g soil−1)	H+	Al3+ (cmolc kg−1)
		(cm)				Sand	Silt	Clay				(cmolc kg−1)
	Dong Thap	0–15	1.12	54.2	254	3.2	43.5	53.3	42.6	0.42	12.1	5.93	0.33
		15–30	1.08	55.6	236	2.5	47.5	50	38.9	0.35	7.82	4.62	0.26
	Vinh Long	0–15	1.05	54.1	249	2.9	42.9	54.2	47.1	0.51	9.37	5.56	0.39
		15–30	1.1	52.9	250	2.4	41.9	55.7	40.8	0.39	10.4	5.05	0.27

## Sheet: Yield in greenhouse
STT	Location	Treatment**	Replication	Number of tuber pot−1	Tuber diameter (cm)	Tuber length (cm)	Yield (kg pot−1)
1	Dong Thap	1	1	6.2	3.3	16.5	0.6		**
2		1	2	5.3	3.7	15.2	0.62		1	40-kg P2O5 ha−1
3		1	3	5.9	3.13	14.6	0.55		2	40-kg P2O5 ha−1 coated with DCAP
4		1	4	5.3	3.25	15.9	0.57		3	60-kg P2O5 ha−1;
5		2	1	6	3.74	17.2	0.71		4	60-kg P2O5 ha−1 coated with DCAP
6		2	2	5	4.1	15.5	0.69		5	80-kg P2O5 ha−1
7		2	3	5.36	4.6	16.9	0.7		6	80-kg P2O5 ha−1 coated with DCAP
8		2	4	6	3.3	18.5	0.79
9		3	1	6.2	3.76	19.1	0.81
10		3	2	5.7	3.83	20	0.86
11		3	3	5.3	3.6	16.9	0.69
12		3	4	5.3	3.39	18.6	0.78
13		4	1	4.9	4.7	19.4	0.87
14		4	2	5.6	4.39	22.3	0.89
15		4	3	5.7	4.85	19	0.92
16		4	4	6.2	4.97	18.8	0.92
17		5	1	4.8	4.39	19.6	0.87
18		5	2	5.8	5.05	21.5	0.92
19		5	3	6.3	4.73	20.7	0.82
20		5	4	4.9	4.84	21.3	0.99
21		6	1	5.8	4.62	18.9	0.92
22		6	2	6.1	5.28	21.6	0.87
23		6	3	4.6	5.02	19.3	0.88
24		6	4	6	4.72	22.7	0.81
25	Vinh Long	1	1	6.2	3.08	12.8	0.48
26		1	2	4.9	3.75	13.9	0.65
27		1	3	5.8	3.06	15.2	0.58
28		1	4	5.3	3.48	14.5	0.54
29		2	1	5.4	3.86	16.2	0.73
30		2	2	5.9	3.7	17.1	0.68
31		2	3	6.1	3.39	15.2	0.77
32		2	4	4.7	4.23	14.2	0.71
33		3	1	4.9	4.27	17.4	0.83
34		3	2	5.3	3.49	16.5	0.79
35		3	3	5.5	3.86	18.4	0.81
36		3	4	6.2	3.76	15.9	0.77
37		4	1	6.5	4.72	19.2	0.79
38		4	2	4.6	4.22	20.3	0.89
39		4	3	5.7	4.61	19.6	0.85
40		4	4	5.8	4.22	21.3	0.83
41		5	1	5.9	4.73	19.5	0.84
42		5	2	5.7	4.39	20.6	0.89
43		5	3	4.8	3.86	21.4	0.87
44		5	4	5.8	4.52	19.7	0.88
45		6	1	6	4.71	20.6	0.9
46		6	2	5.4	4.68	22.2	0.78
47		6	3	6.2	4.7	20.3	0.88
48		6	4	5.1	4.95	19.6	0.96

## Sheet: Soil chemical in greenhouse
	Location	Depth (cm)	Treatment**	Replication	pHH2O (1:2.5)	P availability (mg P kg−1)	Total P (% P)	Fe2+ (mg kg−1)	Al3+ (cmolc kg−1)		**
	Dong Thap	0-15	1	1	4.05	18.5	0.08	45.6	0.35		1	40-kg P2O5 ha−1
			1	2	4.12	17.8	0.07	42.1	0.27		2	40-kg P2O5 ha−1 coated with DCAP
			1	3	3.88	17.4	0.06	39.9	0.36		3	60-kg P2O5 ha−1;
			1	4	4.26	19	0.08	38.5	0.26		4	60-kg P2O5 ha−1 coated with DCAP
			2	1	4.06	23.1	0.07	37.7	0.24		5	80-kg P2O5 ha−1
			2	2	3.92	21.5	0.07	42.3	0.34		6	80-kg P2O5 ha−1 coated with DCAP
			2	3	4.26	21.9	0.08	41.6	0.37
			2	4	3.8	22.2	0.1	39.4	0.33
			3	1	3.99	24.5	0.09	42.3	0.4
			3	2	4.06	25.6	0.11	38.9	0.26
			3	3	4.14	26.8	0.07	39.9	0.24
			3	4	4.31	27.1	0.09	41.5	0.36
			4	1	3.75	28.5	0.05	42.6	0.31
			4	2	4.28	29.2	0.12	43.7	0.35
			4	3	3.98	27.7	0.07	41	0.44
			4	4	3.89	28.9	0.08	44.2	0.33
			5	1	4.09	30.1	0.09	43.1	0.37
			5	2	4.31	30.3	0.1	40.1	0.31
			5	3	3.8	29.6	0.07	42.3	0.36
			5	4	4.25	29.9	0.09	43.2	0.35
			6	1	3.86	31.6	0.12	41	0.32
			6	2	4.02	33.1	0.1	44.1	0.29
			6	3	4.18	32.5	0.08	42	0.27
			6	4	4.35	34.3	0.06	43.3	0.21
		15-30	1	1	4.26	17.5	0.1	40.2	0.31
			1	2	4.62	16.5	0.08	37.5	0.26
			1	3	4.35	18.1	0.07	34.2	0.35
			1	4	4	17.7	0.12	36.4	0.27
			2	1	3.98	20.5	0.11	35.1	0.31
			2	2	4.35	22.1	0.08	37.5	0.35
			2	3	4.29	21.6	0.07	37.7	0.26
			2	4	4.44	22	0.09	38.1	0.28
			3	1	4.08	23.6	0.05	37.6	0.24
			3	2	4.32	24.7	0.13	34.8	0.33
			3	3	4.18	26.9	0.08	35.6	0.27
			3	4	4.48	23.2	0.07	37.8	0.29
			4	1	4.32	26.7	0.07	38.2	0.24
			4	2	4.72	27.5	0.09	37.1	0.32
			4	3	4.51	27.2	0.12	35.4	0.36
			4	4	4.1	26.9	0.05	36.8	0.3
			5	1	4.26	30.1	0.07	38.2	0.28
			5	2	4.39	28.8	0.08	37.1	0.26
			5	3	4.33	28.7	0.06	36.9	0.24
			5	4	4.56	29.5	0.07	38.4	0.25
			6	1	4.27	31.7	0.05	38.1	0.21
			6	2	4.36	30.5	0.09	39.2	0.28
			6	3	4.15	32.7	0.1	35.7	0.26
			6	4	4.38	32.1	0.12	36.9	0.27
	Vinh Long	0-15	1	1	4	16.2	0.07	43.6	0.41
			1	2	4.25	14.3	0.09	44.5	0.37
			1	3	4.12	15.7	0.08	45.7	0.48
			1	4	3.85	16.5	0.08	43.9	0.43
			2	1	3.89	18.5	0.06	47.2	0.38
			2	2	4.13	19.6	0.12	46.3	0.46
			2	3	4.08	20.1	0.08	44.1	0.47
			2	4	4.22	17.9	0.09	43.9	0.39
			3	1	4.06	22.2	0.11	46.2	0.43
			3	2	3.88	19.2	0.08	43.7	0.44
			3	3	4.26	19.1	0.07	45.1	0.42
			3	4	3.9	23.5	0.07	44	0.5
			4	1	4.05	24.6	0.12	43.2	0.47
			4	2	4.16	26.9	0.06	46.8	0.38
			4	3	4.23	28.9	0.08	43.7	0.42
			4	4	3.79	30.1	0.09	46.8	0.38
			5	1	4.21	29.9	0.08	47.6	0.51
			5	2	4.01	32.6	0.07	45.8	0.5
			5	3	3.78	33.4	0.08	46.7	0.47
			5	4	4.22	30.8	0.09	45.6	0.43
			6	1	4.13	34.1	0.09	48.1	0.46
			6	2	4.06	32.8	0.12	41.9	0.39
			6	3	4.23	31.5	0.1	46.2	0.41
			6	4	4.07	32.6	0.09	47.1	0.39
		15-30	1	1	4.15	18.9	0.1	41.1	0.25
			1	2	4.23	16.5	0.07	43.5	0.27
			1	3	4.05	18.4	0.12	42.6	0.29
			1	4	4.26	17.9	0.08	43.1	0.31
			2	1	4.18	20.5	0.12	44.5	0.26
			2	2	4.1	22.6	0.11	38.6	0.23
			2	3	4.22	23.4	0.08	37.6	0.32
			2	4	3.89	24.5	0.07	39.9	0.36
			3	1	4.32	21.9	0.08	42.1	0.23
			3	2	4.26	24.8	0.06	43.6	0.31
			3	3	4.15	26.7	0.09	40.3	0.28
			3	4	4.05	27.5	0.11	40.9	0.36
			4	1	4.32	27.9	0.13	41.8	0.26
			4	2	4.11	31.2	0.14	42.9	0.27
			4	3	4.18	33.1	0.12	43.7	0.33
			4	4	4	30.1	0.05	44.2	0.24
			5	1	3.89	34.2	0.07	43	0.28
			5	2	4.26	35.4	0.08	41.8	0.35
			5	3	4.16	34.8	0.12	41.9	0.24
			5	4	4.11	35.7	0.09	43.8	0.27
			6	1	3.99	36.2	0.13	44.2	0.29
			6	2	4.08	37.1	0.07	43.6	0.31
			6	3	4.16	31.2	0.08	42.8	0.33
			6	4	4.1	33.4	0.1	41	0.25

## Sheet: P uptake in greenhouse
	Location	Treatment	Replication	P content (% P2O5)		Dry biomass (g pot−1)		Total P uptake (g P2O5 pot−1)	HI
				Stem	Tuber	Stem	Tuber					**
	Dong Thap	1	1	0.59	0.43	145	300	214.55	0.674157			1	40-kg P2O5 ha−1
		1	2	0.6	0.42	140	310	214.2	0.688889			2	40-kg P2O5 ha−1 coated with DCAP
		1	3	0.58	0.4	144	275	193.52	0.656325			3	60-kg P2O5 ha−1;
		1	4	0.55	0.46	150	285	213.6	0.655172			4	60-kg P2O5 ha−1 coated with DCAP
		2	1	0.65	0.46	166	355	271.2	0.681382			5	80-kg P2O5 ha−1
		2	2	0.65	0.44	155	345	252.55	0.69			6	80-kg P2O5 ha−1 coated with DCAP
		2	3	0.62	0.47	152	350	258.74	0.697211
		2	4	0.68	0.52	155	395	310.8	0.718182
		3	1	0.63	0.5	158	405	302.04	0.719361
		3	2	0.62	0.48	157	430	303.74	0.732538
		3	3	0.66	0.45	155	345	257.55	0.69
		3	4	0.69	0.42	163	390	276.27	0.705244
		4	1	0.67	0.52	168	435	338.76	0.721393
		4	2	0.72	0.53	162	445	352.49	0.733114
		4	3	0.75	0.51	170	460	362.1	0.730159
		4	4	0.72	0.56	165	460	376.4	0.736
		5	1	0.71	0.51	165	435	339	0.725
		5	2	0.77	0.55	168	460	382.36	0.732484
		5	3	0.72	0.56	161	410	345.52	0.718039
		5	4	0.7	0.53	160	495	374.35	0.755725
		6	1	0.73	0.57	167	460	384.11	0.733652
		6	2	0.72	0.54	165	435	353.7	0.725
		6	3	0.69	0.54	163	440	350.07	0.729685
		6	4	0.74	0.56	172	405	354.08	0.701906
	Vinh Long	1	1	0.64	0.48	153	240	213.12	0.610687
		1	2	0.62	0.42	149	325	228.88	0.685654
		1	3	0.58	0.43	145	290	208.8	0.666667
		1	4	0.57	0.43	145	270	198.75	0.650602
		2	1	0.65	0.52	157	365	291.85	0.699234
		2	2	0.68	0.48	162	340	273.36	0.677291
		2	3	0.66	0.49	162	385	295.57	0.703839
		2	4	0.63	0.53	158	355	287.69	0.692008
		3	1	0.67	0.5	168	415	320.06	0.711835
		3	2	0.68	0.55	162	395	327.41	0.709156
		3	3	0.69	0.51	153	405	312.12	0.725806
		3	4	0.67	0.53	161	385	311.92	0.705128
		4	1	0.71	0.56	166	395	339.06	0.7041
		4	2	0.72	0.57	163	445	371.01	0.731908
		4	3	0.69	0.6	177	425	377.13	0.70598
		4	4	0.67	0.56	172	415	347.64	0.706985
		5	1	0.73	0.57	170	420	363.5	0.711864
		5	2	0.72	0.57	168	445	374.61	0.725938
		5	3	0.69	0.62	179	435	393.21	0.708469
		5	4	0.72	0.58	172	440	379.04	0.718954
		6	1	0.73	0.59	173	450	391.79	0.722311
		6	2	0.7	0.6	166	390	350.2	0.701439
		6	3	0.71	0.58	182	440	384.42	0.707395
		6	4	0.73	0.56	170	480	392.9	0.738462

## Sheet: Soil properties in field
	Location	Depth (cm)	Treatment	Replication	pHH2O (1:2.5)	P availability (mg P kg−1)	Total P (% P)	Fe2+ (mg kg−1)	Al3+ (cmolc kg−1)
	Dong Thap	0-15	100% P	1	4.53	28.6	0.05	35.2	0.25
			100% P	2	4.26	32.1	0.11	31.5	0.21
			100% P	3	4.31	28.5	0.12	29.7	0.26
			100% P	4	4.35	26.5	0.08	34.3	0.3
			100% P + DCAP	1	4.38	30.1	0.12	41.2	0.28
			100% P + DCAP	2	4.12	27.7	0.09	35.6	0.18
			100% P + DCAP	3	4.44	26.3	0.08	29.1	0.21
			100% P + DCAP	4	4.32	28.2	0.13	28.7	0.27
			75% P	1	4.39	19.5	0.15	33.4	0.19
			75% P	2	4.62	18.7	0.08	29.6	0.25
			75% P	3	4.38	16.9	0.05	35.8	0.28
			75% P	4	4.57	17.7	0.12	41.3	0.33
			75% P + DCAP	1	4.63	33.1	0.11	38.6	0.39
			75% P + DCAP	2	4.32	29.3	0.11	34	0.21
			75% P + DCAP	3	4.71	27.5	0.09	35.6	0.29
			75% P + DCAP	4	4.33	31.5	0.13	37.2	0.27
		15-30	100% P	1	4.39	25.4	0.1	40.5	0.23
			100% P	2	4.28	32.1	0.14	38.2	0.29
			100% P	3	4.56	26.9	0.11	35.6	0.31
			100% P	4	4.31	30.4	0.08	34.9	0.33
			100% P + DCAP	1	4.56	25.6	0.07	37.4	0.34
			100% P + DCAP	2	4.35	29.9	0.08	28.9	0.15
			100% P + DCAP	3	4.62	30.2	0.09	35.6	0.28
			100% P + DCAP	4	4.29	25.8	0.15	34.2	0.28
			75% P	1	4.39	15.8	0.12	40.3	0.29
			75% P	2	4.54	20.2	0.06	25.1	0.31
			75% P	3	4.61	17.9	0.11	33.8	0.4
			75% P	4	4.28	18.3	0.08	29.6	0.35
			75% P + DCAP	1	4.58	26.9	0.09	36.2	0.34
			75% P + DCAP	2	4.15	27.8	0.09	40.8	0.3
			75% P + DCAP	3	4.43	29.9	0.08	30.2	0.22
			75% P + DCAP	4	4.55	25.8	0.1	37.1	0.46
	Vinh Long	0-15	100% P	1	4.15	25.6	0.12	50.2	0.36
			100% P	2	4.28	24.8	0.09	47.6	0.42
			100% P	3	4.2	23.6	0.08	35.9	0.44
			100% P	4	3.99	26.8	0.13	43.2	0.25
			100% P + DCAP	1	4.32	24.6	0.11	51.1	0.36
			100% P + DCAP	2	4.16	29.2	0.1	41.6	0.41
			100% P + DCAP	3	4.18	24.9	0.07	43.1	0.38
			100% P + DCAP	4	4.39	25.7	0.05	40.1	0.43
			75% P	1	4.36	15.8	0.09	35.6	0.38
			75% P	2	4.35	16.9	0.13	45.9	0.49
			75% P	3	4.33	13.7	0.04	33.9	0.4
			75% P	4	4.25	14.5	0.11	38.4	0.25
			75% P + DCAP	1	4.29	24.3	0.16	41.3	0.34
			75% P + DCAP	2	4.3	27.1	0.08	37.5	0.31
			75% P + DCAP	3	4.18	28.6	0.06	36.4	0.24
			75% P + DCAP	4	4.33	24.8	0.07	39.2	0.37
		15-30	100% P	1	3.98	24.4	0.09	43.3	0.26
			100% P	2	4.12	27.8	0.11	41.9	0.27
			100% P	3	3.77	26.3	0.05	41.6	0.31
			100% P	4	4.38	25.1	0.08	39.2	0.25
			100% P + DCAP	1	4.26	24.6	0.13	46.3	0.29
			100% P + DCAP	2	4.31	28.2	0.09	41.3	0.33
			100% P + DCAP	3	4.22	21	0.15	37.2	0.28
			100% P + DCAP	4	4.4	23.1	0.09	36.1	0.33
			75% P	1	3.99	15.7	0.11	35.4	0.24
			75% P	2	4.13	14.8	0.13	34.9	0.31
			75% P	3	4.55	16.2	0.08	42.9	0.19
			75% P	4	4.26	15.7	0.09	32.6	0.24
			75% P + DCAP	1	4.38	24.6	0.12	33.9	0.26
			75% P + DCAP	2	4.26	25.3	0.11	38.6	0.37
			75% P + DCAP	3	4.19	24.9	0.08	37.6	0.24
			75% P + DCAP	4	4.09	26.5	0.09	35.4	0.28

## Sheet: Yield & P accumulation in field
	Location	Treatment	Replication	Yield (t/ha)	P content (% P)		Dry biomass (kg ha−1)		Total P uptake (kg ha−1)
					Stem	Tuber	Stem	Tuber
	Dong Thap	100% P	1	23.2	0.68	0.46	5.03	9.36	77.26
		100% P	2	20.9	0.71	0.52	5.1	9.5	85.61
		100% P	3	20.2	0.72	0.51	4.98	9.35	83.541
		100% P	4	22.3	0.73	0.49	4.89	9.45	82.002
		100% P + DCAP	1	21.5	0.72	0.48	5.12	9.48	82.368
		100% P + DCAP	2	21	0.73	0.51	4.99	9.36	84.163
		100% P + DCAP	3	22.4	0.75	0.47	5.03	9.47	82.234
		100% P + DCAP	4	20.9	0.71	0.52	5.06	9.48	85.222
		75% P	1	18.9	0.65	0.43	4.56	8.62	66.706
		75% P	2	19.6	0.64	0.47	4.62	8.65	70.223
		75% P	3	20.2	0.67	0.42	4.53	8.73	67.017
		75% P	4	19.7	0.65	0.4	4.59	8.68	64.555
		75% P + DCAP	1	21.5	0.69	0.48	5.1	9.36	80.118
		75% P + DCAP	2	20.9	0.72	0.46	5.11	9.48	80.4
		75% P + DCAP	3	23.1	0.73	0.52	4.99	9.42	85.411
		75% P + DCAP	4	22.5	0.71	0.51	5.07	9.55	84.702
	Vinh Long	100% P	1	24.5	0.65	0.48	5.22	10.25	83.13
		100% P	2	23.2	0.69	0.46	5.11	10.4	83.099
		100% P	3	23.9	0.75	0.46	5.23	9.89	84.719
		100% P	4	24.1	0.7	0.45	5.17	10.6	83.89
		100% P + DCAP	1	25.2	0.67	0.5	5.11	10.5	86.737
		100% P + DCAP	2	24.3	0.73	0.46	5.08	10.2	84.004
		100% P + DCAP	3	23.6	0.74	0.47	5.09	10.1	85.136
		100% P + DCAP	4	23.1	0.71	0.43	5.13	9.68	78.047
		75% P	1	20.9	0.65	0.39	4.75	8.79	65.156
		75% P	2	21.2	0.62	0.42	4.56	8.77	65.106
		75% P	3	20.5	0.67	0.42	4.62	8.99	68.712
		75% P	4	19.9	0.62	0.43	4.71	8.76	66.87
		75% P + DCAP	1	24.2	0.75	0.45	5.16	10.3	85.05
		75% P + DCAP	2	23.9	0.68	0.49	5.11	9.89	83.209
		75% P + DCAP	3	25.1	0.7	0.49	5.23	9.78	84.532
		75% P + DCAP	4	24.3	0.71	0.42	5.03	10.8	81.073
